# Supplementary material for: New insight into the shape-controlled synthesis and microwave shielding properties of iron oxide covered with reduced graphene oxide
Source: Royal Society of Chemistry journal article supplement (doi:10.1039/c4ra10417j), 2014-11-06
Supplement: c4ra10417j1.pdf [file c4ra10417j1.pdf]

## Supporting Information(ESI)

### New Insight into Shape-Controlled Synthesis and microwave shielding properties of iron oxide covered with reduced graphene oxide

Ankit Gupta<sup>1,2</sup>, Avanish Pratap Singh<sup>2</sup>, Swati Varshney<sup>1</sup>, Narayan Agrawal<sup>1</sup>, Pradeep Sambyal<sup>2</sup>, Yashraj Pandey<sup>1</sup>, Bhanu Pratap Singh<sup>2</sup>, V. N. Singh<sup>1</sup>, Bipin Kumar Gupta<sup>2</sup> and S. K. Dhawan<sup>2,\*</sup>

<sup>1</sup> Delhi Institute of Tool Engineering New Delhi –110 020 (India)

<sup>2</sup> CSIR-National Physical Laboratory, Dr. K. S. Krishnan Road, New Delhi –110 012 (India)

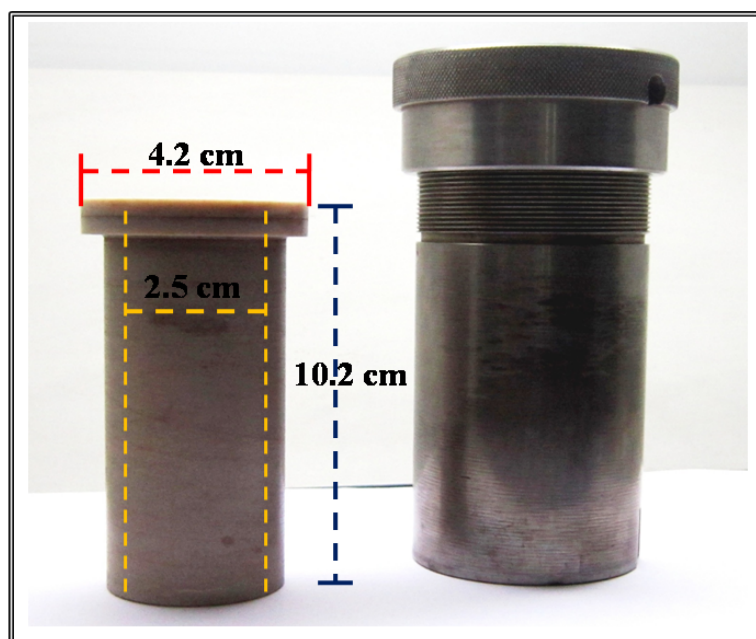

**Figure S1:** Autoclave used for the Hydrothermal process.

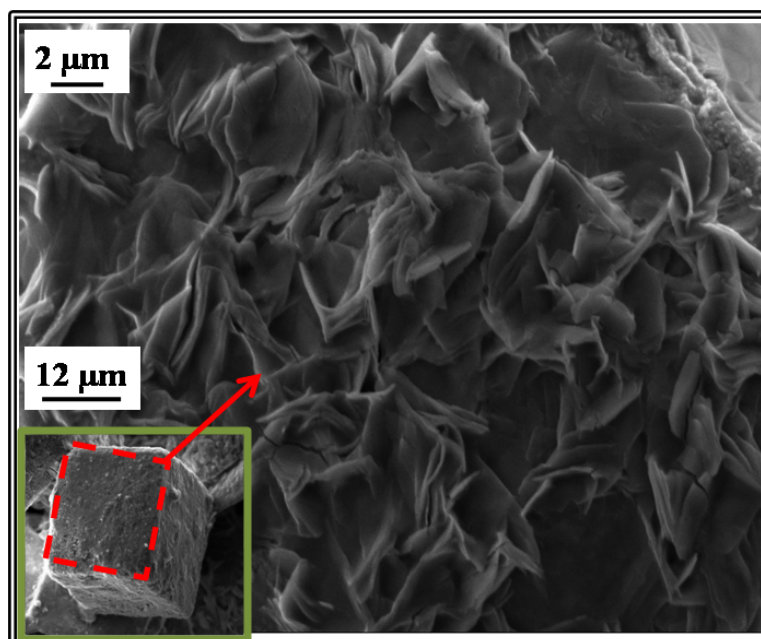

**Figure S2:** Magnified view of SEM micrograph of iron oxide cubes.

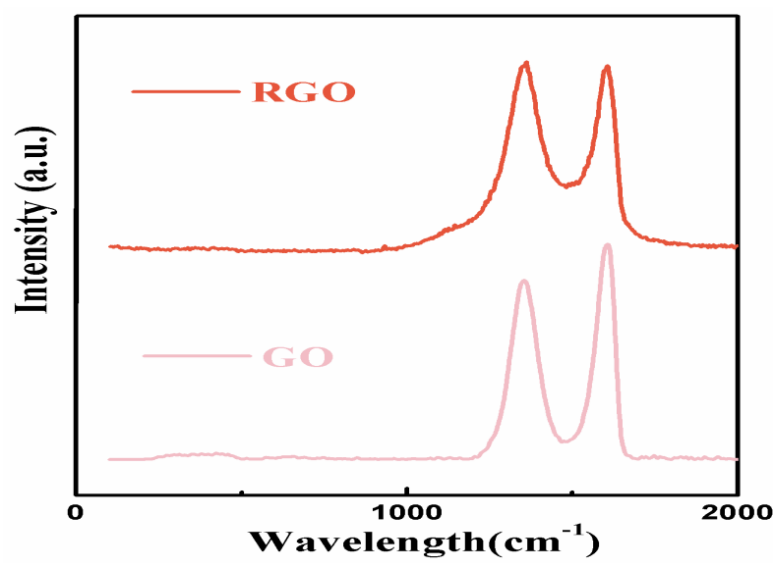

**Figure S3:** Raman spectra of GO and RGO.

**Table S2:** ID/IG ratio of different samples.

| SAMPLES | D-Band (cm <sup>-1</sup> ) | G-Band (cm <sup>-1</sup> ) | ID/IG |
|---------|----------------------------|----------------------------|-------|
| GO      | 1357.27                    | 1609.03                    | 0.84  |
| RGO     | 1357.17                    | 1603.85                    | 1.001 |
| RRods   | 1304.7                     | 1588.48                    | 1.66  |
| RCubes  | 1309.88                    | 1586.11                    | 1.19  |
| RFlakes | 1309.76                    | 1586.08                    | 1.23  |

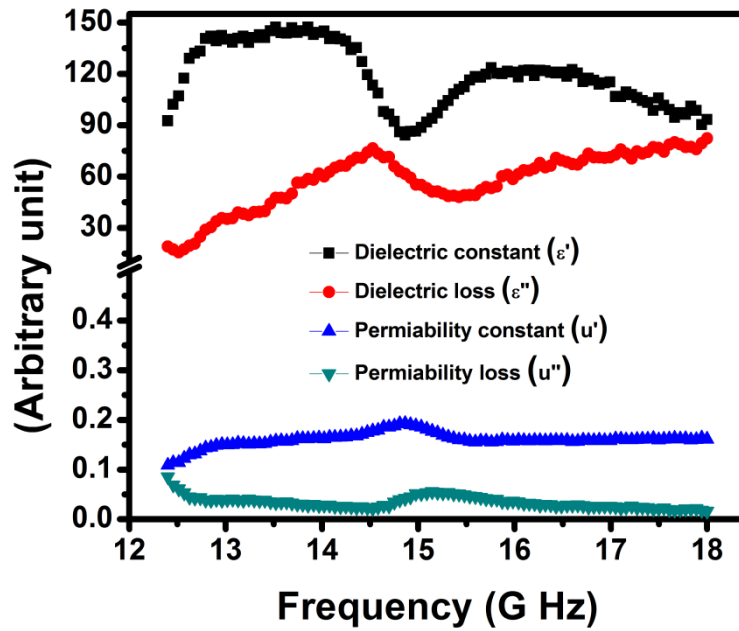

**Figure S4:** Behavior of complex permittivity and complex permeability of rod shaped iron oxide/RGO composite in Ku band frequency range.
